# Supplementary material
Source: Springer Nature journal article supplement (https://www.springermedizin.de/resource/supplementary/13024_2012_374_MOESM2_ESM.pdf/9643848)
Supplement: MOESM2 [file 9643848]

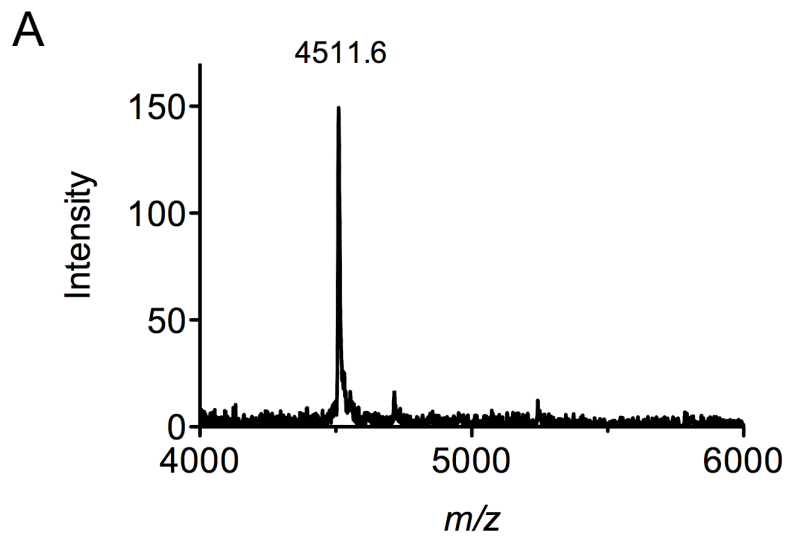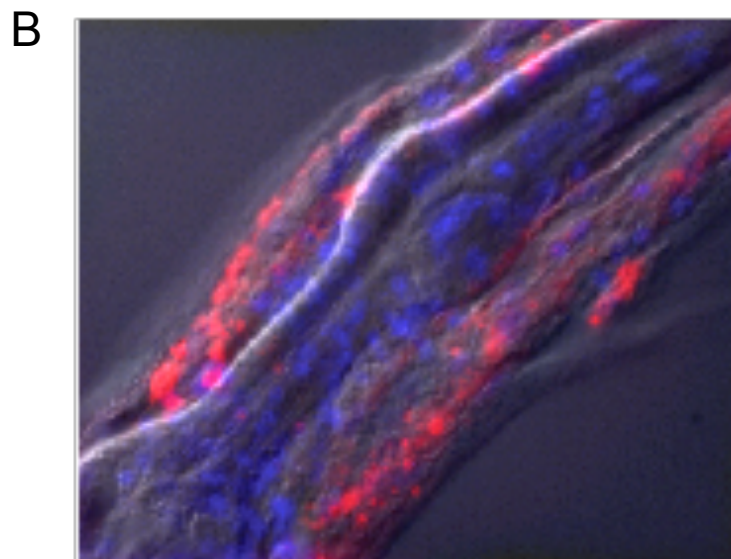

Fig S2
